# Supplementary material for: Sphalerite as a non-traditional critical metal source: Correlative microscopy (EPMA, EBSD, and APT) of cobalt-enriched sulfides from the sediment-hosted copper-cobalt Dolostone Ore Formation deposit, Namibia
Source: Frontiers journal article supplement (doi:10.3389/feart.2023.1171859), 2023-04-28
Supplement: Data_Sheet_1.DOCX [file Data_Sheet_1.DOCX]

Supplementary Material A


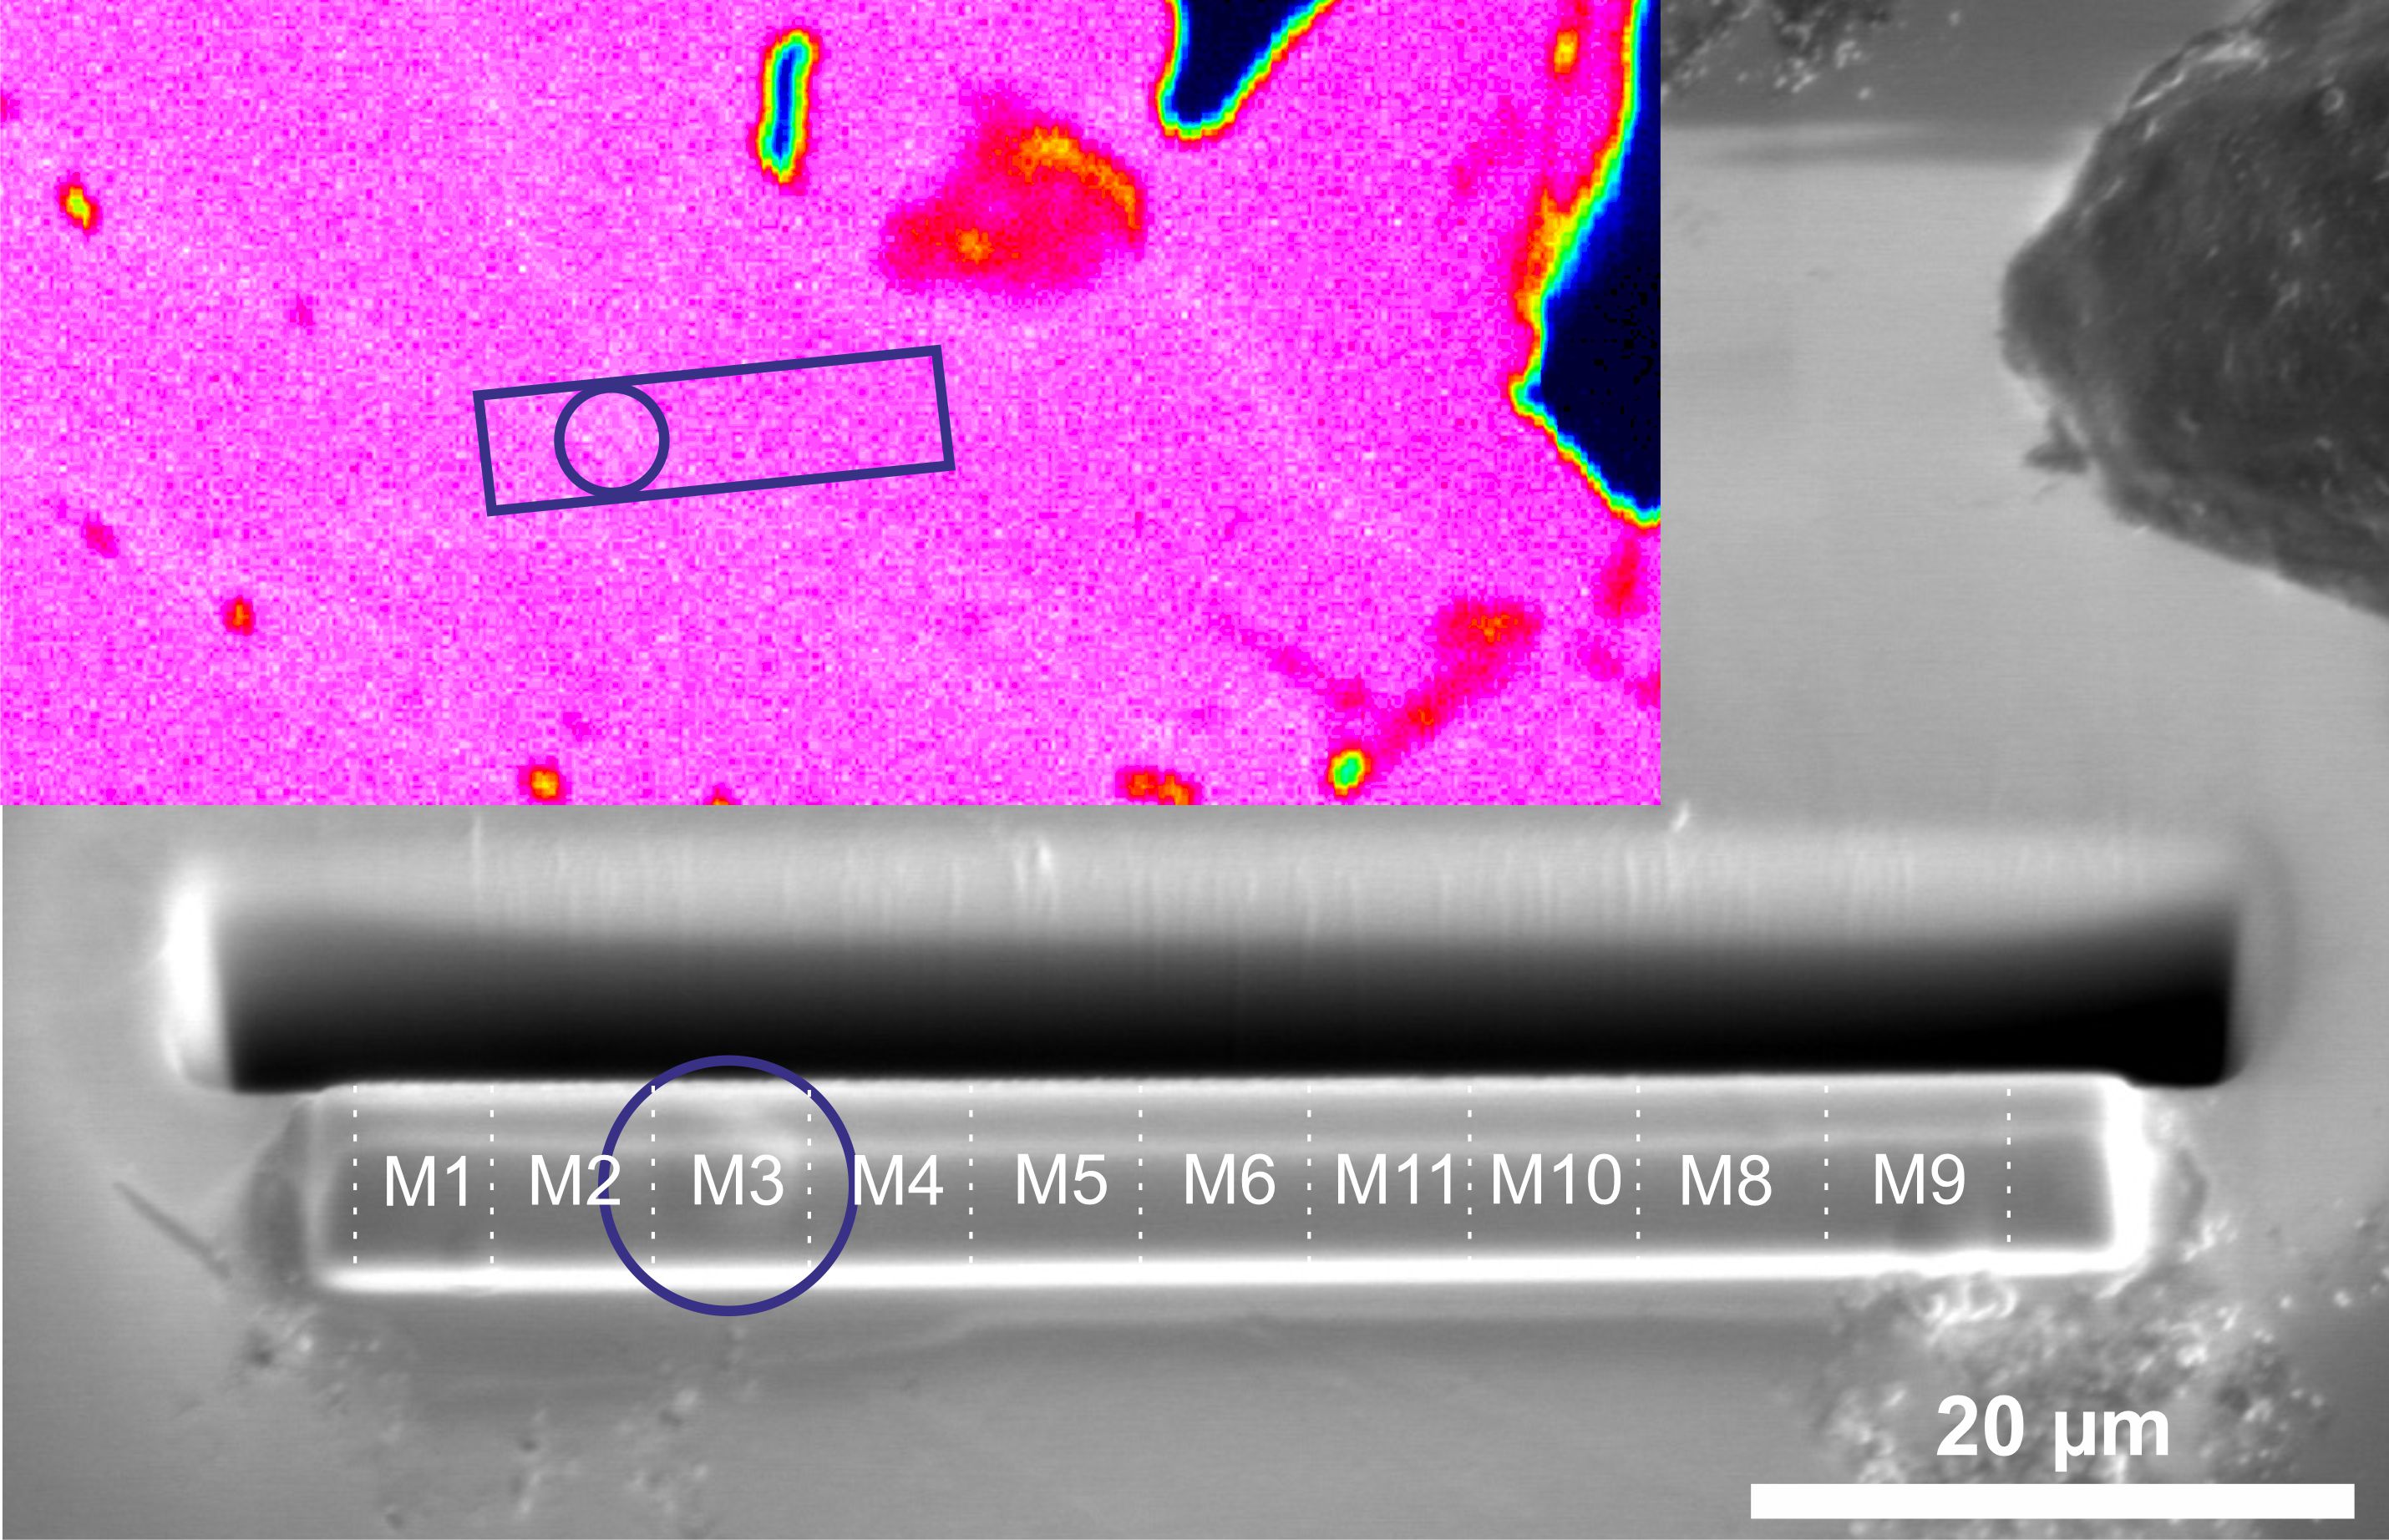


**Supplementary Figure 1.** Second electron FIB-SEM micrograph of the platinum cover that is positioned over the targeted liftout bar. Sections M9 and M11 were successfully run in the APT and used in this study. Blue circle shows a thicker platinum dot marking the intersect of the low Fe/Co network. The inset image shows the liftout bar area in an EPMA Zn element map, white lines is the low Fe/Co network.
