# Supplementary material for: Sphalerite as a non-traditional critical metal source: Correlative microscopy (EPMA, EBSD, and APT) of cobalt-enriched sulfides from the sediment-hosted copper-cobalt Dolostone Ore Formation deposit, Namibia
Source: Frontiers journal article supplement (doi:10.3389/feart.2023.1171859), 2023-04-28
Supplement: Data_Sheet_4.DOCX [file Data_Sheet_4.DOCX]

Supplementary Material D


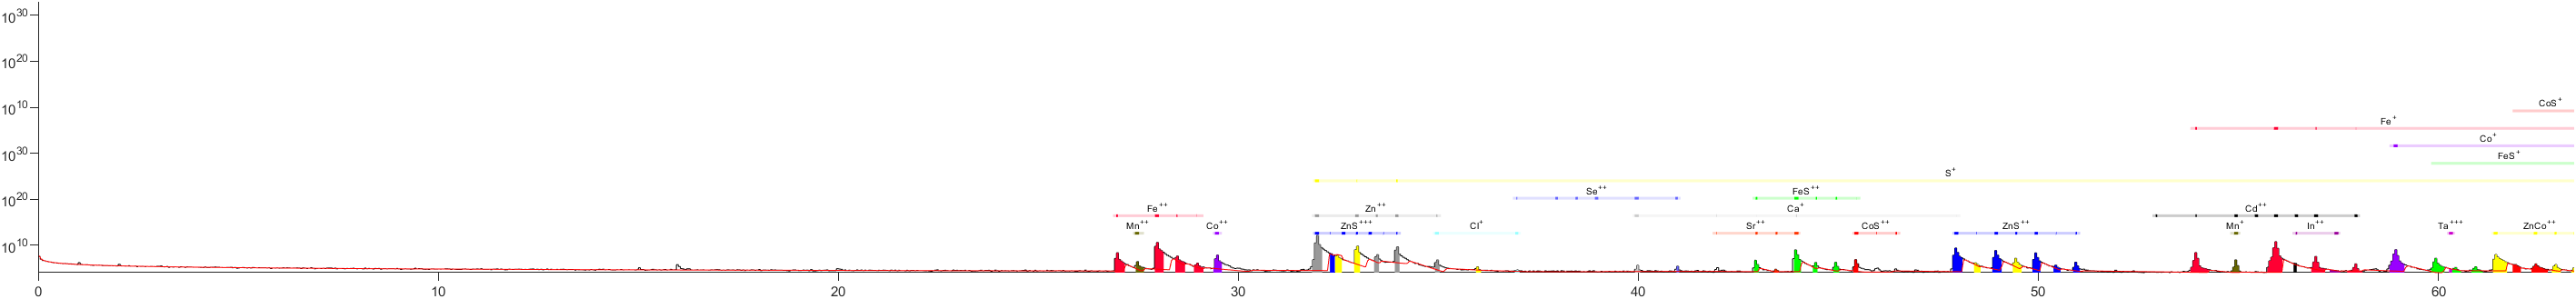

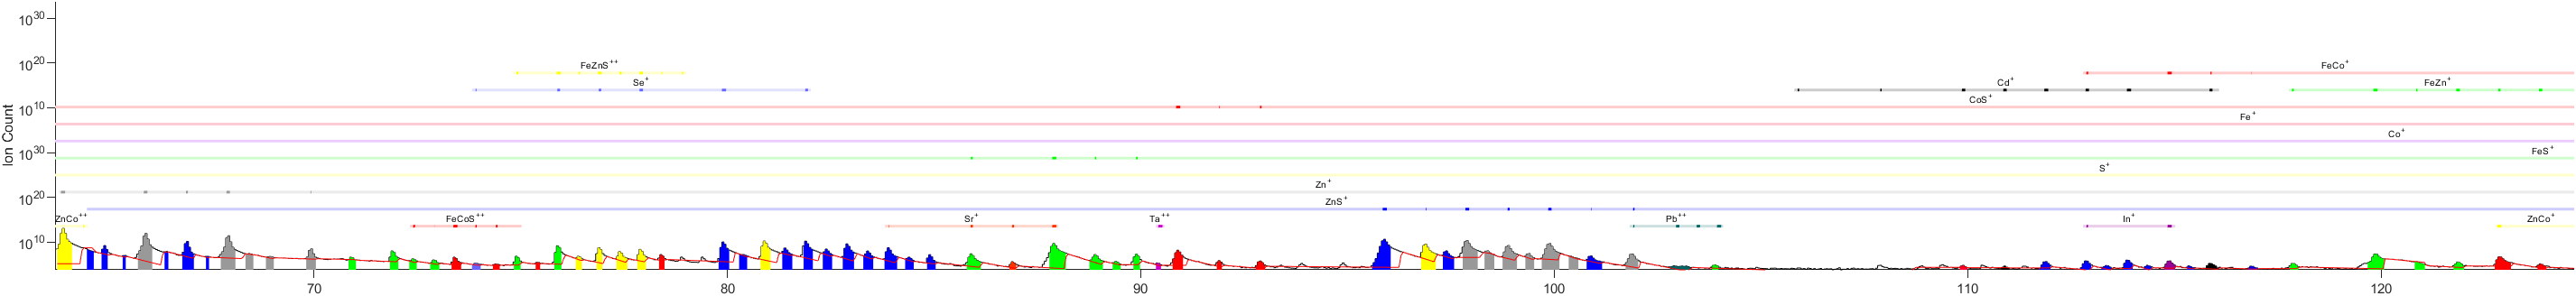

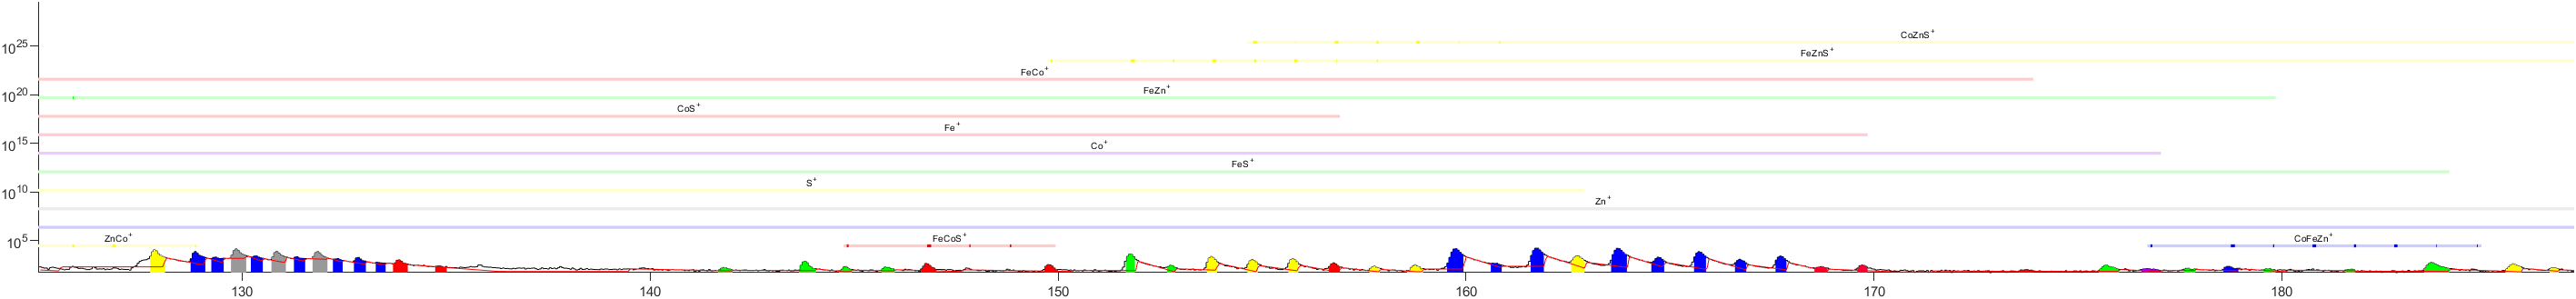
**
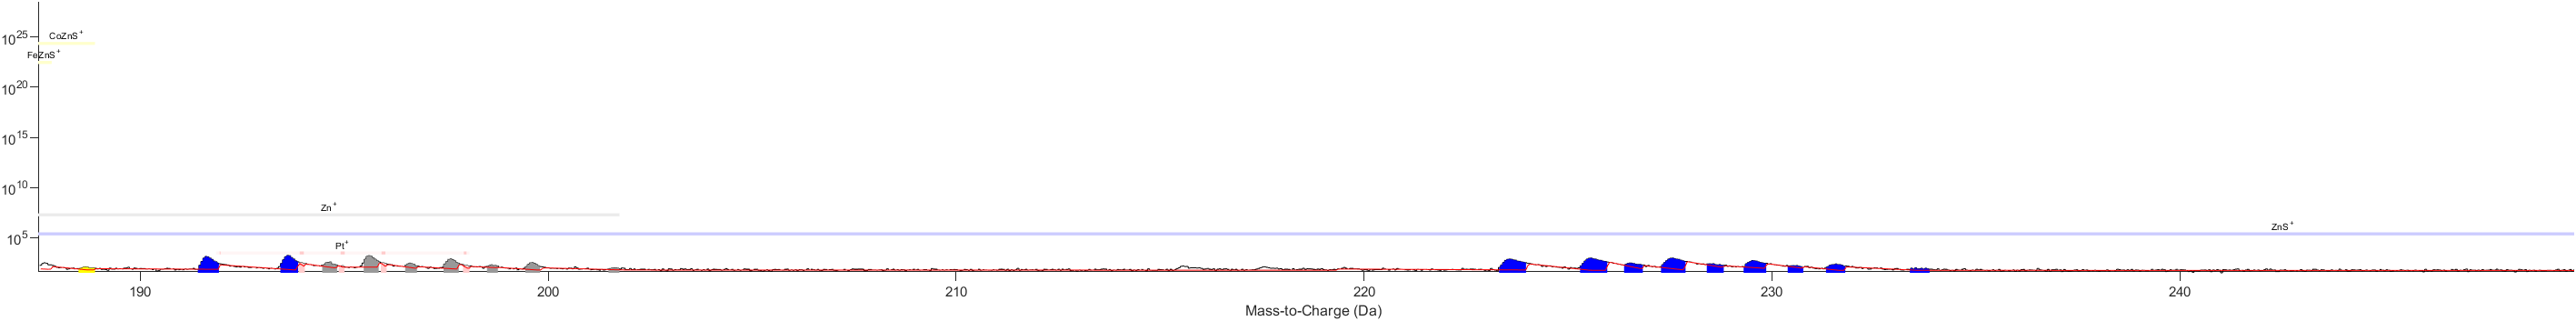
**

**Supplementary Figure 5.** APT mass spectrum of Co-rich sphalerite, with simplified mass ranges marked out.
