# Supplementary material for: Sphalerite as a non-traditional critical metal source: Correlative microscopy (EPMA, EBSD, and APT) of cobalt-enriched sulfides from the sediment-hosted copper-cobalt Dolostone Ore Formation deposit, Namibia
Source: Frontiers journal article supplement (doi:10.3389/feart.2023.1171859), 2023-04-28
Supplement: Data_Sheet_5.docx [file Data_Sheet_5.docx]

Supplementary Material E

|  | Element | Composition | Lower Confidence interval | Upper Confidence interval |
| --- | --- | --- | --- | --- |
| at% | S | 52.5 | 52.4 | 52.6 |
| Zn | 42.4 | 42.3 | 42.5 |
| Fe | 4.32 | 4.32 | 4.33 |
| Co | 0.696 | 0.692 | 0.701 |
|  |  |  |  |  |
| at ppm | Mn | 179 | 174 | 185 |
| Cd | 103 | 84 | 120 |
| Se | 44.1 | 39.3 | 94.6 |
| In | 34.7 | 30.1 | 39.9 |

**Supplementary Figure 5.** Supplementary Table 1. Sphalerite composition (in at%) using the AtomProbeLab Matlab script (London, 2019).
